1 **Title:**

2 An ultrasensitive method for analysis of viral spike N-glycoforms

3

4 **Authors:**

5 Sabyasachi Baboo\*, Jolene K Diedrich, Salvador Martínez-Bartolomé, Xiaoning Wang, Torben

6 Schiffner, Bettina Groschel, William R Schief, James C Paulson & John R Yates III\*

7

8 **Affiliations:**

9 **Department of Molecular Medicine, The Scripps Research Institute, La Jolla, CA, USA**

10 Sabyasachi Baboo, Jolene K Diedrich, Salvador Martínez-Bartolomé, Xiaoning Wang, James C

11 Paulson and John R Yates III

12 **IAVI Neutralizing Antibody Center, The Scripps Research Institute, La Jolla, CA, USA**

13 Torben Schiffner, Bettina Groschel, William R Schief

14 **Department of Immunology and Microbiology, The Scripps Research Institute, La Jolla,**

15 **CA, USA**

16 Torben Schiffner, Bettina Groschel, William R Schief, James C Paulson

17 **The Ragon Institute of Massachusetts General Hospital, Massachusetts Institute of**

18 **Technology and Harvard, Cambridge, MA, USA**

19 Torben Schiffner, William R Schief

20

21 **Present address:**

22 **Institut für Wirkstoffentwicklung, Universität Leipzig, Leipzig, Germany**

23 Torben Schiffner

24

25 **Corresponding authors:**

26 Correspondence to Sabyasachi Baboo ([sbaboo@scripps.edu](mailto:sbaboo@scripps.edu)) or John R Yates III

27 ([jyates@scripp.sedu](mailto:jyates@scripp.sedu))

28

29 **Keywords:**

30 proteomics, mass spectrometry, Proteinase K, N-glycan, heterogeneity, HIV, Env, viral spike

31

32 **Words:**

33 1,462 (abstract/70 + main)

34

35 **Abstract:**

36 Viruses can evade the host immune system by displaying numerous glycans on their surface  
37 “spike-proteins” that cover immune epitopes. We have developed an ultrasensitive “single pot”  
38 method to assess glycan occupancy and the extent of glycan processing from high-mannose to  
39 complex forms at each N-glycosylation site. Though aimed at characterizing glycosylation of  
40 viral spike proteins as potential vaccines, this method is applicable for analysis of site-specific  
41 glycosylation of any glycoprotein.

42

43 **Main:**

44 Viral spike-proteins initiate virus entry into host cells and are the primary targets of vaccine  
45 design. Spike-proteins are often heavily N-glycosylated which help to shield the protein from the  
46 host immune response<sup>1</sup>. These glycans add complexity to the production and characterization of

47 recombinant protein-based vaccines<sup>2</sup>. This is particularly a concern for characterization of the  
48 envelope spike-protein (*Env*) of the Human Immunodeficiency Virus (HIV) comprising a trimer  
49 with each monomer containing 26-30 unique N-linked glycosylation sites (NGS) as defined by  
50 the sequon NX [S|T], where X is any amino acid except P<sup>3</sup>. To address this analytical challenge  
51 several mass spectrometry-based strategies using multiple proteases<sup>4-6</sup> have been implemented to  
52 create sufficient numbers of peptides unique to each glycosylation site<sup>3, 7, 8</sup>. In these strategies,  
53 individual aliquots are digested with each protease and analyzed separately by liquid  
54 chromatography-mass spectrometry (LC-MS/MS), or pooled and analyzed together. To broadly  
55 characterize the nature of the glycosylation at each NGS, we had previously introduced the use  
56 of endoglycosidases that create residual mass signatures<sup>3</sup>. This helped us to determine the degree  
57 of glycan occupancy, and the degree of glycan processing – from the high mannose form that is  
58 initially attached to the protein, which may mature into the complex form when mannose  
59 residues are replaced by “terminal” monosaccharide sequences. To achieve coverage for all  
60 NGS, we had combined several digestions performed with different proteases and achieved  
61 >95% sequence coverage. Here we show that it is possible to replace these multiple proteolytic  
62 digestions with a single Proteinase K (PK) digestion, and moreover through careful choice of  
63 volatile buffers we have developed an improved “single pot” strategy with significantly  
64 increased sensitivity.

65  
66 PK is a broadly specific serine-protease that has previously been exploited for its potential to  
67 generate overlapping peptides and high sequence coverage<sup>9</sup>. The redundancy afforded by  
68 overlapping sequences significantly increases confidence in identifications, especially when  
69 covalent modifications are present<sup>4</sup>. However, because proteinase K is an aggressive protease it

70 is necessary to attenuate its proteolytic activity to obtain high sequence coverage of proteins.  
71 Attenuation of PK can be achieved using suboptimal reaction conditions<sup>9</sup> (to reduce the rate of  
72 enzyme activity) and limited reaction time. Using a mildly acidic, chaotrope-free solution to  
73 attenuate the activity of PK, we were able to achieve >95% sequence coverage of candidate viral  
74 spike proteins and identify all NGS. The proteomic strategy of our new method is conceptually  
75 similar to our previous approach<sup>3</sup>, but it is significantly faster and more sensitive. These  
76 improvements result from three key changes to the strategy: [1] using only mass spectrometry-  
77 compatible constituents, samples are processed in a single solution except the final step of  
78 PNGase F deglycosylation; [2] reaction volumes are kept to a minimum (5-8  $\mu$ l) to increase the  
79 rate of reaction to limit sample loss on surfaces and minimize freeze-drying time; and [3] the use  
80 of PK provides faster digestion and excellent sequence and NGS coverage with less starting  
81 material. Our new method reduces sample preparation time from 3 days to 1 day, reduces LC-  
82 MS/MS run times by 9-24 fold, and can achieve 50-180 times higher sensitivity than existing  
83 methods<sup>3, 7, 8</sup>. In addition, we have developed the data analysis tool GlycoMSQuant which further  
84 reduces analysis times and simplifies data analysis.

85  
86 We tested our approach on BG505 SOSIP.664 MD39<sup>10</sup>, a stabilized native-like HIV *Env* trimer  
87 being developed for an HIV vaccination strategy<sup>11</sup> targeting germline precursors of broadly  
88 neutralizing antibodies (bNAbs) that are impacted by N-glycans. As in our previous approach<sup>3</sup>,  
89 the glycosylated peptides generated by PK digestion were sequentially deglycosylated; first with  
90 Endo H to remove high-mannose and hybrid N-glycans, and then with PNGase F, which  
91 removes all remaining N-glycans. The resulting residual masses on asparagine (N) in NGS is  
92 +203 Da at sites occupied by high-mannose/hybrid N-glycans or +3 Da at sites occupied by

93 complex N-glycans when PNGase F deglycosylation is carried out in the presence of H<sub>2</sub><sup>18</sup>O  
94 (differentiating these sites from any deamidated Ns). Unoccupied NGS results in no (+0 Da)  
95 residual mass on N. Using this new method (**Fig. 1a**), we achieved >99% amino acid sequence  
96 coverage and identified all theoretically possible 27 NGSs from a single LC-MS/MS run of 0.5  
97 µg of peptides generated from a starting material of 5 µg purified protein (**Fig. 1b** and  
98 **Supplementary Figures 1a,b**). We used semi-quantitative label-free analysis based on precursor  
99 peak areas to calculate the proportion of N-glycan occupancy (unoccupied: complex: high-  
100 mannose/hybrid N-glycans) for each NGS. We reanalyzed the N-glycan microheterogeneity  
101 pattern on BG505 SOSIP.664<sup>12</sup> HIV *Env* trimer from data obtained using our previous approach<sup>3</sup>  
102 and compared it with results using the method we describe here (**Supplementary Figures 2**). The  
103 results with improved method were highly comparable to those using our original approach, in  
104 spite of being processed differently and the samples being prepared at different times in different  
105 laboratories.  
106  
107 Initial results demonstrated that the new approach is at least 18 times more sensitive than our  
108 previous approach<sup>3</sup> even though it uses a simpler and shorter workflow. To evaluate the limit of  
109 sensitivity of our method, we processed progressively decreasing amounts of starting material,  
110 ranging from 1 µg to 5 ng. We observed that a single LC-MS/MS run with 1 µg of starting  
111 material was enough to cover >95% of the amino acid sequence and all NGS (**Fig. 2a**), which is  
112 90 times more sensitive than our previous approach<sup>3</sup>. Major differences in microheterogeneity at  
113 each NGS were generally observed when we started with <100 ng material (**Supplementary**  
114 **Figure 1c**). This is likely due to low sampling as evidenced by a decrease in amino acid

115 sequence and NGS coverage (**Fig. 2a**), as well as the absolute number of identified peptides  
116 representing each NGS (**Supplementary Figure 1d**).

117  
118 The improved method is agnostic to mass spectrometry platform (**Fig. 2b**). A timsTOF Pro mass-  
119 spectrometer coupled to an Evosep One HPLC (timsTOF/Evosep)<sup>13</sup> was used to achieve >99%  
120 sequence coverage and identification of all NGS using a single LC-MS/MS run with 0.5 µg of  
121 starting material and an 88-minute LC gradient (**Fig. 1c** and **Supplementary Figures 3a,b**).  
122 Thus, the sensitivity of our method on this platform was 180 times higher than our previous  
123 approach<sup>3</sup>.

124  
125 N-glycan heterogeneity reflects the immunogenicity of the viral spike-protein and is critical for  
126 designing vaccines<sup>14</sup>. The reproducibility of N-glycan heterogeneity patterns obtained with our  
127 new method suggests that this is a robust procedure. Variability in sequence coverage are not  
128 observed until the limits of detection are reached on an LC-MS/MS platform. Although our  
129 results within the same LC-MS platform were reproducible (except some variations when using  
130 different proteases, **Supplementary Figure 5**), we may infer the effects of sampling differences  
131 when comparing two different LC-MS platforms (QE-HFX vs. timsTOF/Evosep), as in case of  
132 N156, N160, N197, N386, N392 (relative peptide abundance is persistently low) and N88, N295,  
133 N301, N332, N355, N406, N411 (possible skewing of timsTOF/Evosep identification against  
134 N+203 peptides when peptide sampling per NGS decreases due to less starting material) (**Fig. 2b**  
135 and **Supplementary Figures 1c,d** and **3c,d**). When enough sampling per NGS is achieved, these  
136 variations are diminished (**Figs. 1b,c**).

137

138 We attribute improvements in our method to efficient sample handling strategies. We observed  
139 reduced sequence coverage if the sample was from the digestion of a small amount of starting  
140 material rather than an equal aliquot from a larger sample (*Supplementary Figure 3e*). We infer  
141 that the sensitivity differences are not occurring during LC-MS/MS, but that sample is being lost  
142 to the reaction-tube surface (during reaction and lyophilization) and the proportion of loss is  
143 more pronounced when we start with less material. The kinetics of the enzyme-substrate reaction  
144 may also account for sensitivity differences since a more “crowded” reactant environment (low  
145 reaction volumes) is expected to result in better reaction kinetics<sup>15</sup>.

146  
147 The simplicity and high reproducibility of this procedure will allow for high-throughput analyses  
148 of viral spike-proteins and for any glycoprotein whether produced recombinantly or purified  
149 from natural sources. Results were highly comparable in the two LC-MS/MS platforms we used.  
150 A single analysis using a QE-HFX/nLC platform can determine the complete N-glycan  
151 heterogeneity pattern from 1 microgram of purified viral spike-protein. The timsTOF/Evosep  
152 platform was observed to be more sensitive than QE-HFX/nLC across all NGS, although limited  
153 sampling may not allow us to confidently infer N-glycan microheterogeneity at all NGS. We  
154 view the high sensitivity of this robust method to be an important step to analysis of the  
155 glycosylation of more complex samples such as whole virus or virus in infected blood<sup>16</sup>.

156

## 157 **Methods:**

158

### 159 Expression and purification of HIV *Env* trimers

160 BG505 SOSIP.664<sup>12</sup> and BG505 SOSIP.664 MD39<sup>10</sup> *Env* trimers were expressed and purified  
161 essentially as described previously<sup>10</sup>. Briefly, sequences with codons optimized for expression in  
162 human cells were synthesized and cloned into pHLSec between *AgeI/KpnI* by Genscript. The  
163 constructs were co-transfected with Furin-encoding plasmid, using polyethylenimine in Freestyle  
164 293F cells cultured in 293 FreeStyle media (Thermo Fisher Scientific). Where indicated, 15  $\mu$ M  
165 sterile-filtered Kifunensine (Cayman Chemical) was added after transfection. After 6-7 days,  
166 supernatant was collected after passing through 0.22  $\mu$ m filter (Nalgene), and the C-terminally  
167 His-tagged trimers were purified using a HisTrap affinity column (Cytiva) with a linear elution  
168 gradient from 20-500 mM imidazole, followed by a Superdex 200 Increase SEC column (Cytiva)  
169 in Tris-buffered saline/TBS (20 mM Tris, 100 mM NaCl, pH 7.5). The oligomeric state and  
170 purity of trimer was verified using size exclusion chromatography coupled with multi-angle light  
171 scattering (SEC-MALS; DAWN HELEOS II/ Optilab T-rEX, Wyatt Technology).

172

### 173 Proteinase K treatment and deglycosylation

174 HIV Env trimer was exchanged to water using Microcon Ultracel-10 centrifugal device  
175 (Millipore Sigma). Trimer was reduced with 5 mM tris(2-carboxyethyl)phosphine hydrochloride  
176 (TCEP-HCl, Thermo Scientific) and alkylated with 10 mM 2-chloroacetamide (Sigma Aldrich)  
177 in 100 mM ammonium acetate for 20 min at room temperature (RT, 24°C). Initial protein-level  
178 deglycosylation was performed using 250 U of Endo H (New England Biolabs) for up to 5  $\mu$ g  
179 trimer, for 1 h at 37°C (pH 5.5-6.0). Trimer was digested with 1:25 Proteinase K (Sigma  
180 Aldrich) for 4 h at 37°C (pH 5.5-6.0). PK was denatured by incubating at 90°C for 15 min, then  
181 cooled to RT. Peptides were deglycosylated again with 250 U Endo H for 1 h at 37°C (pH 5.5-  
182 6.0), then frozen at -80°C and lyophilized. 100 U PNGase F (New England Biolabs) was



183 lyophilized (for up to 5  $\mu$ g trimer), resuspended in 100 mM ammonium bicarbonate prepared in  
184  $\text{H}_2^{18}\text{O}$  (97%  $^{18}\text{O}$ , Sigma-Aldrich), and added to the lyophilized peptides. The resulting 5-8  $\mu$ l  
185 reaction solutions (except PNGase F reaction, in 5-20  $\mu$ l) were then incubated for 1 h at 37°C  
186 (pH 8.0-8.5) in 0.2 ml PCR tubes on a thermocycler with heated lid.

187

#### 188 Validating efficiency of glycosidases

189 BG505 SOSIP.664 HIV *Env* trimer glycosylated with only high-mannose N-glycans (purified  
190 from cells treated with Kifunensine<sup>17</sup>, which inhibits processing of high-mannose N-glycans to  
191 complex N-glycans during protein maturation), was sequentially treated with Endo H, followed  
192 by PNGase F. After treatment with both enzymes, 99.2% of identified peptides were N+203;  
193 100% of peptides identified with only PNGase F treatment were N+3 (***Supplementary Figures***  
194 ***4a,b***; proportions do not consider unoccupied NGS because they remained similar in both  
195 experiments – 8-10%). We realize the possibility that glycosidase PNGase F may occasionally  
196 cleave the remnant GlcNAc (N-Acetylglucosamine)<sup>18</sup> post-Endo H processing of high-  
197 mannose/hybrid N-glycans and thus, convert the mass modification characteristic of high-  
198 mannose/hybrid (+203) to complex (+3) N-glycans, which would affect our analyses. However,  
199 we have not observed any significant evidence of this possibility in our results, though it may  
200 explain why we observe a few peptides with +3 mass modified NGS in Kifunensine treated  
201 samples (***Supplementary Figure 4a***).

202

#### 203 Trypsin proteolysis

204 The Proteinase K/deglycosylation method described above was followed, except PK was  
205 replaced with trypsin and reactions were incubated overnight at 37°C. Trypsin generated a lower

206 total number of peptides than PK, but we obtained >95% sequence coverage, including 26 of 27  
207 NGS (*Supplementary Figure 5a*). Variations in N-glycan microheterogeneity at certain NGS  
208 may be explained by low sampling at these sites (N386, N392) or difference in cleavage-  
209 specificity between PK and trypsin (N88, N611) (*Supplementary Figures 5b,c*).

210

## 211 LC-MS/MS

### 212 *Q Exactive HF-X with EASY-nLC 1200*

213 Samples were analyzed on an Q Exactive HF-X mass spectrometer (Thermo). Samples were  
214 injected directly onto a 25 cm, 100 µm ID column packed with BEH 1.7 µm C18 resin (Waters).  
215 Samples were separated at a flow rate of 300 nL/min on an EASY-nLC 1200 (Thermo). Buffers  
216 A and B were 0.1% formic acid in 5% and 80% acetonitrile, respectively. The following  
217 gradient was used: 1–25% B over 160 min, an increase to 40% B over 40 min, an increase to  
218 90% B over another 10 min and 30 min at 90% B for a total run time of 240 min. Column was  
219 re-equilibrated with solution A prior to the injection of sample. Peptides were eluted from the tip  
220 of the column and nanosprayed directly into the mass spectrometer by application of 2.8 kV at  
221 the back of the column. The mass spectrometer was operated in a data dependent mode. Full  
222 MS1 scans were collected in the Orbitrap at 120,000 resolution. The ten most abundant ions per  
223 scan were selected for HCD MS/MS at 25 NCE. Dynamic exclusion was enabled with exclusion  
224 duration of 10 s and singly charged ions were excluded.

### 225 *timsTOF Pro with Evosep One*

226 Samples were loaded onto EvoTips following manufacturer protocol. The samples were run on  
227 an Evosep One (Evosep) coupled to a timsTOF Pro (Bruker Daltonics). Samples were separated  
228 on a 15 cm × 150 µm ID column with BEH 1.7 µm C18 beads (Waters) and integrated tip pulled

229 in-house using either the 30 SPD or 15 SPD methods. Mobile phases A and B were 0.1% formic  
230 acid in water and 0.1% formic acid in acetonitrile, respectively. MS data was acquired in PASEF  
231 mode with 1 MS1 survey TIMS-MS and 10 PASEF MS/MS scans acquired per 1.1 s acquisition  
232 cycle. Ion accumulation and ramp time in the dual TIMS analyzer was set to 100 ms each and we  
233 analyzed the ion mobility range from  $1/K_0 = 0.6 \text{ Vs cm}^{-2}$  to  $1.6 \text{ Vs cm}^{-2}$ . Precursor ions for  
234 MS/MS analysis were isolated with a 2 Th window for  $m/z < 700$  and 3 Th for  $m/z > 700$  with a  
235 total  $m/z$  range of 100-1700. The collision energy was lowered linearly as a function of  
236 increasing mobility starting from 59 eV at  $1/K_0 = 1.6 \text{ VS cm}^{-2}$  to 20 eV at  $1/K_0 = 0.6 \text{ Vs cm}^{-2}$ .  
237 Singly charged precursor ions were excluded with a polygon filter, precursors for MS/MS were  
238 picked at an intensity threshold of 2,500, target value of 20,000 and with an active exclusion of  
239 24 s.

240

#### 241 Data Processing

242 Protein and peptide identification were done with Integrated Proteomics Pipeline (IP2, Bruker  
243 Scientific LLC). Tandem mass spectra were extracted from raw files using RawConverter<sup>19</sup>  
244 (timstofCoverter for timsTOF Pro data) and searched with ProLuCID<sup>20</sup> against a database  
245 comprising UniProt reviewed (Swiss-Prot) proteome for *Homo sapiens* (UP000005640), UniProt  
246 amino acid sequences for Endo H (P04067), PNGase F (Q9XBM8), and Proteinase K (P06873),  
247 amino acid sequences for BG505 SOSIP.664<sup>12</sup> and BG505 SOSIP.664 MD39<sup>10</sup> (including a  
248 preceding secretory signal sequence and followed by 6xHis-tag), and a list of general protein  
249 contaminants. The search space included no cleavage-specificity (all fully tryptic and semi-  
250 tryptic peptide candidates for trypsin treatment). Carbamidomethylation (+57.02146 C) was  
251 considered a static modification. Deamidation in presence of  $\text{H}_2^{18}\text{O}$  (+2.988261 N), GlcNAc

252 (+203.079373 N), oxidation (+15.994915 M) and N-terminal pyroglutamate formation (–  
253 17.026549 Q) were considered differential modifications. Data was searched with 50 ppm  
254 precursor ion tolerance and 50 ppm fragment ion tolerance. Identified proteins were filtered  
255 using DTASelect2<sup>21</sup> and utilizing a target-decoy database search strategy to limit the false  
256 discovery rate to 1%, at the spectrum level<sup>22</sup>. A minimum of 1 peptide per protein and no tryptic  
257 end (or 1 tryptic end when treated with trypsin) per peptide were required and precursor delta  
258 mass cut-off was fixed at 10 ppm for data acquired with Q Exactive HF-X or 20 ppm for data  
259 acquired with timsTOF Pro. Statistical models for peptide mass modification (modstat) were  
260 applied (trypstat was additionally applied for trypsin-treated samples). Census2<sup>23</sup> label-free  
261 analysis was performed based on the precursor peak area, with a 10 ppm precursor mass  
262 tolerance and 0.1 min retention time tolerance. “Match between runs” was used to find missing  
263 peptides between runs for Q Exactive HF-X data (for timsTOF Pro data, reconstructed-MS1  
264 based chromatograms combining isotope peaks for all triggered precursor ions were pre-  
265 generated, and then chromatograms were assigned to identified peptides for quantitative analysis,  
266 without retrieving missing peptides).

267

#### 268 Data Analysis using GlycoMSQuant

269

270 Our new tool GlycoMSQuant v.1.4.1 (<https://github.com/proteomicsyates/GlycoMSQuant>) was  
271 implemented to automate the analysis and to visualize the results. GlycoMSQuant summed  
272 precursor peak areas across replicates, discarded peptides without NGS, discarded misidentified  
273 peptides when N-glycan remnant-mass modifications were localized to non-NGS asparagines

274 and corrected/fixed N-glycan mislocalization where appropriate. The results were aligned to  
275 NGS in *Env* of HXB2<sup>24</sup> HIV-1 variant.

276  
277 Precursor peak area was calculated by Census2<sup>23</sup> from extracted-ion chromatogram (XIC) for  
278 each peptide in each replicate. For each NGS (NX[S|T], where X is any amino acid except P), the  
279 “N-glycosylation state” represented by proportions for unoccupied (+0, *u*), complex (+2.988261,  
280 *c*) and, high-mannose/hybrid (+203.079373, *h*) N-glycans was calculated as follows.

281  
282 The sum of the precursor peak areas  $S_{g,pepz}$  was calculated as:

283 
$$S_{g,pepz} = \sum xic_{pepz}$$

284 where N-glycosylated peptides with the same sequences and charge were grouped together  
285 (*pepz*), *g* is the N-glycosylation state  $\in G (u, c, h)$ , and *xic* is the precursor peak area.

286 For each group (*pepz*), the abundance proportion  $\%_{g,pepz}$  of each N-glycosylation state  $g \in G$  was  
287 calculated as:

288 
$$\%_{g,pepz} = \frac{S_{g,pepz}}{\sum_{i \in G} S_{i,pepz}}$$

289 Finally, as each NGS may be covered by multiple groups (*pepz*), the proportion of each N-  
290 glycosylation state *g* for a particular NGS (*ngs*) is calculated as the mean of all proportions  
291  $\%_{g,pepz}$  of all groups (*pepz*) covering this NGS:

292 
$$\%_{ngs,g} = \frac{1}{n_{ngs}} \sum \%_{g,pepz}$$

293 where  $n_{ngs}$  is the number of groups (*pepz*) covering a particular NGS.

294 The standard error of mean of the proportion of each N-glycosylation state  $g \in G$  for a particular  
295 NGS ( $SEM_{ngs,g}$ ) was calculated as:

296 
$$SEM_{ngs,g} = \frac{s_{ngs,g}}{\sqrt{n_{ngs}}}$$

297 where,  $s_{ngs,g}$  is the standard deviation of  $\%_{g,pepz}$  from all groups ( $pepz$ ) covering a particular NGS.

298

299 Pairwise statistical comparisons of experiments ( $a$  and  $b$ ) were performed for each  $g \in G$  at each

300 NGS using proportion values  $\%_{g,pepz}$  of groups ( $pepz$ ) sharing the NGS, applying the Mann-

301 Whitney U test<sup>25</sup>. Testing  $\%_{g,pepz,a}$  vs.  $\%_{g,pepz,b}$  individually for  $u$ ,  $c$  and  $h$  at each NGS, we

302 calculated  $p$ -values that were subjected to multiple hypothesis correction using the Benjamini-

303 Hochberg (BH) method<sup>26</sup>. If the corrected  $p$ -value was  $<0.05$  (for  $u$ ,  $c$  or  $h$  at any NGS), then the

304 difference was considered statistically significant.

305

306 For **Supplementary Figure 2**, published data from our previous approach<sup>3</sup> was reanalyzed using

307 the data analysis workflow described here. Briefly, the data analyzed is from 3 replicates of 3

308 conditions, each separately analyzed by LC-MS/MS, with total starting material of 90  $\mu$ g protein,

309 and Census2<sup>23</sup> label-free analysis was performed simultaneously on all 9 experiments without

310 “match between runs”, and the results analyzed by GlycoMSQuant. This was compared with

311 data obtained from a single LC-MS/MS run (QE-HFX/nLC) with 0.5  $\mu$ g of peptides generated

312 from a starting material of 5  $\mu$ g purified protein.

313

#### 314 **Acknowledgements:**

315 We thank Bruker Daltonics for providing access to timsTOF Pro MS. We thank Bruker

316 Scientific LLC and Robin S Park for making IP2 accessible for data analysis. We thank Titus

317 Jung in J.R.Y. lab for IT support. We thank members of the J.R.Y. lab for discussion and Claire

318 Delahunty for critically perusing the manuscript. We thank Saman Eskandarzadeh, Michael

319 Kubitz, and Erik Georgeson in W.R.S. lab for assistance in protein production. This work was  
320 supported by the grants P41GM103533 (NIH) and UM1AI100663, UM1AI144462,  
321 R01/R56AI113867 (NIH/NIAID). We thank Bill and Melinda Gates Foundation (BMGF)  
322 Collaboration for AIDS Vaccine Discovery (CAVD) funding to IAVI Neutralizing Antibody  
323 Center (NAC) and Ragon Institute post-doctoral fellowship to T.S.

324

#### 325 **Author Contributions:**

326 S.B. conceived the method. S.B., J.K.D. and X.W. designed the experiments. S.B. prepared the  
327 samples and analyzed data. J.K.D. performed LC-MS/MS. S.M.B. created the GlycoMSQuant  
328 tool. T.S. and B.G. expressed and purified HIV *Env* trimers. W.R.S., J.C.P. and J.R.Y.  
329 supervised the project. S.B. wrote the paper with contribution from all authors.

330

#### 331 **Competing Interests:**

332 The authors declare no competing interests.

333

#### 334 **Data Availability:**

335 Mass spectrometry data has been deposited in MassIVE-KB repository and is also accessible  
336 through ProteomeXchange Consortium with identifiers MSV000087414 and PXD025990,  
337 respectively.

338

#### 339 **Code Availability:**

340 GlycoMSQuant source code is freely available at

341 <https://github.com/proteomicsyates/GlycoMSQuant> under a permissive Apache License 2.0.

342

343 **References:**

344

- 345 1. Rudd, P.M. & Dwek, R.A. Glycosylation: heterogeneity and the 3D structure of proteins.  
346 *Crit Rev Biochem Mol Biol* **32**, 1-100 (1997).
- 347 2. Burton, D.R. & Hangartner, L. Broadly Neutralizing Antibodies to HIV and Their Role in  
348 Vaccine Design. *Annu Rev Immunol* **34**, 635-659 (2016).
- 349 3. Cao, L. et al. Global site-specific N-glycosylation analysis of HIV envelope glycoprotein.  
350 *Nat Commun* **8**, 14954 (2017).
- 351 4. MacCoss, M.J. et al. Shotgun identification of protein modifications from protein  
352 complexes and lens tissue. *Proc Natl Acad Sci U S A* **99**, 7900-7905 (2002).
- 353 5. Zhang, Y., Fonslow, B.R., Shan, B., Baek, M.C. & Yates, J.R., 3rd Protein analysis by  
354 shotgun/bottom-up proteomics. *Chem Rev* **113**, 2343-2394 (2013).
- 355 6. Tsiatsiani, L. & Heck, A.J. Proteomics beyond trypsin. *Febs j* **282**, 2612-2626 (2015).
- 356 7. Behrens, A.J. et al. Molecular Architecture of the Cleavage-Dependent Mannose Patch  
357 on a Soluble HIV-1 Envelope Glycoprotein Trimer. *J Virol* **91** (2017).
- 358 8. Go, E.P. et al. Glycosylation Benchmark Profile for HIV-1 Envelope Glycoprotein  
359 Production Based on Eleven Env Trimers. *J Virol* **91** (2017).
- 360 9. Wu, C.C., MacCoss, M.J., Howell, K.E. & Yates, J.R., 3rd A method for the  
361 comprehensive proteomic analysis of membrane proteins. *Nat Biotechnol* **21**, 532-538  
362 (2003).
- 363 10. Steichen, J.M. et al. HIV Vaccine Design to Target Germline Precursors of Glycan-  
364 Dependent Broadly Neutralizing Antibodies. *Immunity* **45**, 483-496 (2016).



- 365 11. Steichen, J.M. et al. A generalized HIV vaccine design strategy for priming of broadly  
366 neutralizing antibody responses. *Science* **366** (2019).
- 367 12. Sanders, R.W. et al. A next-generation cleaved, soluble HIV-1 Env trimer, BG505  
368 SOSIP.664 gp140, expresses multiple epitopes for broadly neutralizing but not non-  
369 neutralizing antibodies. *PLoS Pathog* **9**, e1003618 (2013).
- 370 13. Meier, F. et al. Online Parallel Accumulation-Serial Fragmentation (PASEF) with a  
371 Novel Trapped Ion Mobility Mass Spectrometer. *Mol Cell Proteomics* **17**, 2534-2545  
372 (2018).
- 373 14. Seabright, G.E., Doores, K.J., Burton, D.R. & Crispin, M. Protein and Glycan Mimicry in  
374 HIV Vaccine Design. *J Mol Biol* **431**, 2223-2247 (2019).
- 375 15. Zhou, H.X., Rivas, G. & Minton, A.P. Macromolecular crowding and confinement:  
376 biochemical, biophysical, and potential physiological consequences. *Annu Rev Biophys*  
377 **37**, 375-397 (2008).
- 378 16. Bar-On, Y.M., Flamholz, A., Phillips, R. & Milo, R. SARS-CoV-2 (COVID-19) by the  
379 numbers. *Elife* **9** (2020).
- 380 17. Scanlan, C.N. et al. Inhibition of mammalian glycan biosynthesis produces non-self  
381 antigens for a broadly neutralising, HIV-1 specific antibody. *J Mol Biol* **372**, 16-22  
382 (2007).
- 383 18. Fan, J.Q. & Lee, Y.C. Detailed studies on substrate structure requirements of  
384 glycoamidases A and F. *J Biol Chem* **272**, 27058-27064 (1997).
- 385 19. He, L., Diedrich, J., Chu, Y.Y. & Yates, J.R., 3rd Extracting Accurate Precursor  
386 Information for Tandem Mass Spectra by RawConverter. *Anal Chem* **87**, 11361-11367  
387 (2015).

- 388 20. Xu, T. et al. ProLuCID: An improved SEQUEST-like algorithm with enhanced  
389 sensitivity and specificity. *J Proteomics* **129**, 16-24 (2015).
- 390 21. Tabb, D.L., McDonald, W.H. & Yates, J.R., 3rd DTASelect and Contrast: tools for  
391 assembling and comparing protein identifications from shotgun proteomics. *J Proteome*  
392 *Res* **1**, 21-26 (2002).
- 393 22. Peng, J., Elias, J.E., Thoreen, C.C., Licklider, L.J. & Gygi, S.P. Evaluation of  
394 multidimensional chromatography coupled with tandem mass spectrometry (LC/LC-  
395 MS/MS) for large-scale protein analysis: the yeast proteome. *J Proteome Res* **2**, 43-50  
396 (2003).
- 397 23. Park, S.K., Venable, J.D., Xu, T. & Yates, J.R., 3rd A quantitative analysis software tool  
398 for mass spectrometry-based proteomics. *Nat Methods* **5**, 319-322 (2008).
- 399 24. Zhang, M. et al. Tracking global patterns of N-linked glycosylation site variation in  
400 highly variable viral glycoproteins: HIV, SIV, and HCV envelopes and influenza  
401 hemagglutinin. *Glycobiology* **14**, 1229-1246 (2004).
- 402 25. Mann, H.B. & Whitney, D.R. On a Test of Whether one of Two Random Variables is  
403 Stochastically Larger than the Other. *The Annals of Mathematical Statistics* **18**, 50-60  
404 (1947).
- 405 26. Benjamini, Y. & Hochberg, Y. Controlling the False Discovery Rate: A Practical and  
406 Powerful Approach to Multiple Testing. *Journal of the Royal Statistical Society. Series B*  
407 *(Methodological)* **57**, 289-300 (1995).

408

409

410

411 **Figures**

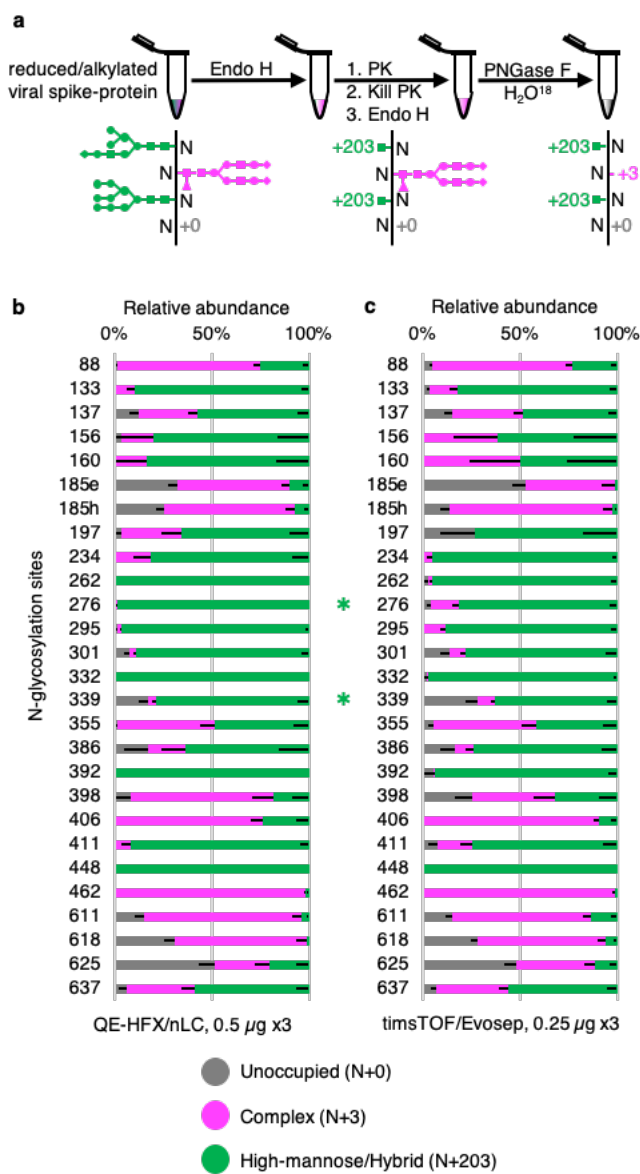

412

413 **Figure 1 | Proteinase K and glycosidase treatment provides N-glycan**  
 414 **microheterogeneity in BG505 SOSIP.664 MD39 trimer.** (a) Method  
 415 workflow, resulting in peptides with expected mass modifications at NGS  
 416 representing N-glycosylation states. (b) Pattern observed using 4 h  
 417 triplicates on a QE-HFX/nLC platform. (c) Pattern observed using 88 min  
 triplicates on timsTOF/Evosep platform. N-glycosylation states are color-  
 coded. Error bars represent mean-SEM. Between (b) and (c), the pattern  
 is similar, and any significant difference (BH-corrected  $p$ -value <0.05) in  
 proportion of a certain N-glycosylation state at an NGS is represented by  
 color-coded \*.

417

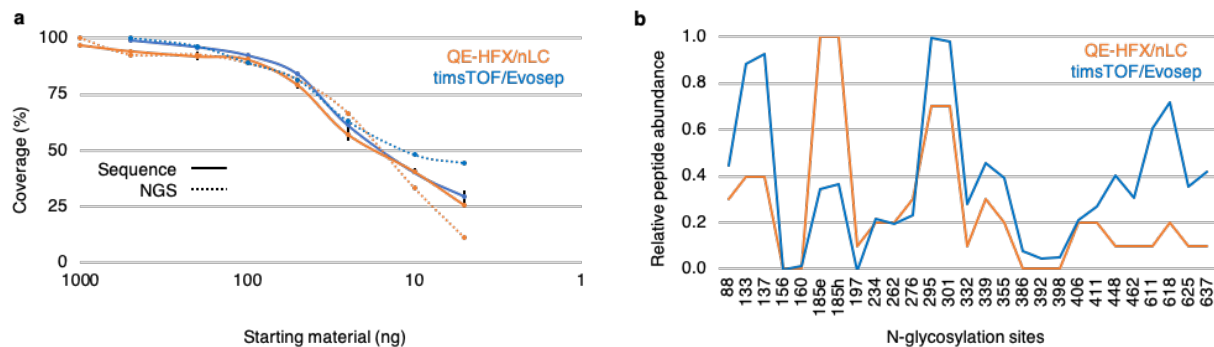

418

419

420

421

422

**Figure 2 | Factors affecting limit of sensitivity.** (a) Decreasing trend of sequence and NGS coverage observed as starting material is diluted 200-fold (1  $\mu$ g to 5 ng, QE-HFX/nLC) or 100-fold (0.5  $\mu$ g to 5 ng, timsTOF/Evosep), using triplicates for each amount of starting material. The limit of sensitivity is revealed. (b) Relative abundance of peptides identified per NGS across the dilution series for the 2 LC-MS/MS platforms used. This comparison reveals a non-uniform digestion pattern that may be attributed to steric hindrance offered by the glycoprotein or characteristic behavior of individual peptides in LC-MS/MS. Error bars represent mean $\pm$ SEM. Values for sequence and NGS coverage are mean
